# Supplementary material for: Seven Additional Patients with SOX17 Related Pulmonary Arterial Hypertension and Review of the Literature
Source: MDPI journal article supplement (doi:10.3390/genes14101965), 2023-10-20
Supplement: s1 [file s1]

| Genomic position                       | *cDNA position (NM_022454.4)     | Protein position                          | Variant effect                   | Diagnosis                         | Reference                                                | Sex         | Age at diagnosis (years) | Exon | CADD | REVEL | ACMG classification | VF (gnomAD) |
|----------------------------------------|----------------------------------|-------------------------------------------|----------------------------------|-----------------------------------|----------------------------------------------------------|-------------|--------------------------|------|------|-------|---------------------|-------------|
| 8:55370742                             | c.44A>C                          | p.Gln15Pro                                | Missense                         | IPAH/HPAH                         | Montani et al., 2022                                     | M           | 53                       | 1    | 25.5 | 0.616 | VUS                 | 0.00000504  |
| 8:55370769                             | c.72_76del                       | p.Met24fsTer52                            | Frameshift                       | IPAH/HPAH                         | Zhu et al., 2018                                         | M           | 3                        | 1    | .    | .     | LP                  | .           |
| 8:55370862                             | c.164C>T                         | p.Pro55Leu                                | Missense                         | IPAH/HPAH                         | Gräf et al., 2018                                        | unk         | unk                      | 1    | 22.9 | 0.196 | LB                  | 0.0000043   |
| 8:55370897                             | c.199C>G                         | p.Arg67Gly                                | Missense                         | IPAH/HPAH                         | Montani et al., 2022                                     | F           | 12                       | 1    | 26.5 | 0.738 | VUS                 | 0.0000319   |
| 8:55370906                             | c.208C>T                         | p.Arg70Trp                                | Missense                         | IPAH/HPAH                         | Montani et al., 2022                                     | F           | 35                       | 1    | 32.0 | 0.961 | VUS                 | .           |
| 8:55370907                             | c.209G>A                         | p.Arg70Gln                                | Missense                         | IPAH/HPAH                         | Hiraide et al., 2018                                     | F<br>M      | 51<br>25                 | 1    | 32.0 | 0.969 | VUS                 | .           |
| 8:55370907                             | c.209G>T                         | p.Arg70Leu                                | Missense                         | IPAH/HPAH                         | This study                                               | M           | 11 months                | 1    | 32.0 | 0.988 | VUS                 | .           |
| 8:55370916                             | c.218A>C                         | p.Asn73Thr                                | Missense                         | IPAH/HPAH                         | This study                                               | M           | 6                        | 1    | 26.7 | 0.855 | VUS                 | .           |
| 8:55370924<br>8:55370924               | c.226A>G<br>c.226A>G             | p.Met76Val<br>p.Met76Val                  | Missense<br>Missense             | APAH-CHD<br>APAH-CHD              | Zhu et al., 2018<br>Zhu et al., 2019                     | F<br>F      | 3<br>3                   | 1    | 27.4 | 0.967 | VUS                 | .           |
| 8:55370942                             | c.244G>T                         | p.Glu82Ter                                | Nonsense                         | APAH-CHD                          | This study                                               | M           | .                        | 1    | 40.0 | .     | LP                  | .           |
| 8:54458415                             | c.277C>A                         | p.Leu93Met                                | Missense                         | APAH-portopulmonar                | Zhu et al., 2019                                         | F           | 57                       | 1    | 24.1 | 0.634 | VUS                 | .           |
| 8:55370982                             | c.284A>G                         | p.Asn95Ser                                | Missense                         | APAH-CHD                          | Zhu et al., 2018                                         | M           | 1                        | 1    | 26.3 | 0.925 | VUS                 | .           |
| 8:55370985                             | c.287C>A                         | p.Ala96Asp                                | Missense                         | IPAH/HPAH                         | Montani et al., 2022                                     | F           | 21                       | 1    | 29.8 | 0.937 | VUS                 | .           |
| 8:55371010                             | c.307+5G>C                       | NA                                        | Splicing                         | IPAH/HPAH                         | Gräf et al., 2018                                        | unk         | unk                      |      | 29.8 | .     | LP                  | .           |
| 8:55370729                             | c.317G>T                         | p.Trp106Leu                               | Missense                         | IPAH/HPAH                         | Zhu et al., 2018                                         | F           | 32                       | 2    | 32   | 0.90  | VUS                 | .           |
| 8:55371632                             | c.322G>T                         | p.Ala108Ser                               | Missense                         | APAH-CHD                          | Hiraide et al., 2018                                     | F           | 2                        | 2    | 24.1 | 0.632 | LB                  | .           |
| 8:55371653                             | c.344del                         | p.Arg115fsTer29                           | Frameshift                       | APAH-CHD                          | Zhu et al., 2018                                         | F           | 14                       | 2    | .    | .     | LP                  | .           |
| 8:54459111                             | c.361G>A                         | p.Ala121Thr                               | Missense                         | IPAH/HPAH                         | Wang et al., 2019                                        | unk         | unk                      | 2    | 29.9 | 0.975 | VUS                 | .           |
| 8:54459112                             | c.365_366del                     | p.Glu122AlafsTer39                        | Frameshift                       | IPAH/HPAH                         | Zhu et al., 2019                                         | F           | 7                        | 2    | .    | .     | LP                  | .           |
| 8:54459129                             | c.379C>T                         | p.Gln127Ter                               | Nonsense                         | IPAH/HPAH                         | Wang et al., 2021                                        | F           | 7                        | 2    | 39.0 | .     | P                   | .           |
| 8:55371698                             | c.388C>T                         | p.Gln130Ter                               | Nonsense                         | APAH-CHD                          | Zhu et al., 2018                                         | M           | 34                       | 2    | 39.0 | .     | LP                  | .           |
| 8:54459142<br>8:54459142<br>8:54459142 | c.392A>G<br>c.392A>G<br>c.392A>G | p.Asp131Gly<br>p.Asp131Gly<br>p.Asp131Gly | Missense<br>Missense<br>Missense | APAH-CHD<br>IPAH/HPAH<br>APAH-CHD | Zhu et al., 2019<br>Zhu et al., 2019<br>Zhu et al., 2018 | F<br>F<br>F | 31<br>40<br>38           | 2    | 28.9 | 0.890 | VUS                 | .           |
| 8:55371704<br>8:55371704               | c.394C>G<br>c.394C>G             | p.His132Asp<br>p.His132Asp                | Missense<br>Missense             | IPAH/HPAH<br>IPAH/HPAH            | Gräf et al., 2018<br>Montani et al., 2022                | unk<br>M    | unk<br>16                | 2    | 27.0 | 0.808 | VUS                 | .           |

## Supplementary Material

|            |              |                     |            |           |                      |     |            |   |      |       |     |           |
|------------|--------------|---------------------|------------|-----------|----------------------|-----|------------|---|------|-------|-----|-----------|
| 8:55371707 | c.397C>T     | p.Pro133Ser         | Missense   | IPAH/HPAH | Gräf et al., 2018    | unk | unk        | 2 | 28.6 | 0.927 | VUS | .         |
| 8:55371707 | c.397C>G     | p.Pro133Ala         | Missense   | IPAH/HPAH | Hiraide et al., 2018 | F   | 33         | 2 | 26.9 | 0.930 | VUS | .         |
| 8:55371708 | c.398C>T     | p.Pro133Leu         | Missense   | APAH-CHD  | Zhu et al., 2018     | M   | 5          | 2 | 31.0 | 0.908 | VUS | .         |
| 8:54459158 | c.408G>C     | p.Lys136Asn         | Missense   | IPAH/HPAH | Wang et al., 2019    | unk | unk        | 2 | 25.1 | 0.878 | VUS | .         |
| 8:55371721 | c.411C>G     | p.Tyr137Ter         | Nonsense   | IPAH/HPAH | Gräf et al., 2018    | unk | unk        | 2 | 38.0 | .     | P   | .         |
| 8:55371723 | c.413G>C     | p.Arg138Pro         | Missense   | IPAH/HPAH | Montani et al., 2022 | M   | 8          | 2 | 31.0 | 0.872 | VUS | .         |
| 8:55371723 | c.413G>C     | p.Arg138Pro         | Missense   | IPAH/HPAH | Montani et al., 2022 | M   | 2          |   |      |       |     |           |
| 8:55371726 | c.416C>T     | p.Pro139Leu         | Missense   | IPAH/HPAH | Montani et al., 2022 | F   | 36         | 2 | 29.9 | 0.793 | VUS | .         |
| 8:54459168 | c.418C>T     | p.Arg140Trp         | Missense   | IPAH/HPAH | Zhu et al., 2019     | F   | 5          | 2 | 32.0 | 0.684 | VUS | .         |
| 8:54459168 | c.418C>T     | p.Arg140Trp         | Missense   | IPAH/HPAH | Montani et al., 2022 | M   | 10         |   |      |       |     |           |
| 8:55371729 | c.419G>C     | p.Arg140Pro         | Missense   | IPAH/HPAH | Gräf et al., 2018    | unk | unk        | 2 | 31.0 | 0.847 | VUS | .         |
| 8:55371729 | c.419G>C     | p.Arg140Pro         | Missense   | IPAH/HPAH | Montani et al., 2022 | F   | 18         |   |      |       |     |           |
| 8:55371732 | c.422G>A     | p.Arg141Gln         | Missense   | IPAH/HPAH | Montani et al., 2022 | M   | 26         | 2 | 32.0 | 0.870 | VUS | .         |
| 8:55371732 | c.422G>A     | p.Arg141Gln         | Missense   | IPAH/HPAH | Montani et al., 2022 | F   | 13         |   |      |       |     |           |
| 8:55371732 | c.422G>T     | p.Arg141Leu         | Missense   | IPAH/HPAH | Montani et al., 2022 | F   | 10         | 2 | 31.0 | 0.901 | VUS | .         |
| 8:55371750 | c.440G>A     | p.Arg147Gln         | Missense   | IPAH/HPAH | Montani et al., 2022 | F   | 13         | 2 | 29.0 | 0.661 | VUS | .         |
| 8:55371799 | c.489G>C     | p.Gln163His         | Missense   | APAH-CTD  | This study           | F   | 34         | 2 | 15.6 | 0.313 | B   | 0.0000189 |
| 8:55371798 | c.499_520del | p.Leu167TrpfsTer213 | Frameshift | APAH-CHD  | Zhu et al., 2018     | M   | 7 (months) |   |      |       |     |           |
| 8:55371798 | c.499_520del | p.Leu167TrpfsTer213 | Frameshift | APAH-CHD  | Zhu et al., 2018     | F   | 3          |   |      |       |     |           |
| 8:55371798 | c.499_520del | p.Leu167TrpfsTer213 | Frameshift | IPAH/HPAH | Zhu et al., 2018     | F   | 5          |   |      |       |     |           |
| 8:55371798 | c.499_520del | p.Leu167TrpfsTer213 | Frameshift | IPAH/HPAH | This study           | M   | 54         |   |      |       |     |           |
| 8:55371798 | c.499_520del | p.Leu167TrpfsTer213 | Frameshift | IPAH/HPAH | This study           | F   | 2          | 2 | .    | .     | P   | .         |
| 8:55371798 | c.499_520del | p.Leu167TrpfsTer213 | Frameshift | IPAH/HPAH | Gräf et al., 2018    | unk | unk        |   |      |       |     |           |
| 8:55371798 | c.499_520del | p.Leu167TrpfsTer213 | Frameshift | IPAH/HPAH | Zhu et al., 2019     | F   | 5          |   |      |       |     |           |
| 8:55371798 | c.499_520del | p.Leu167TrpfsTer213 | Frameshift | IPAH/HPAH | Montani et al., 2022 | F   | 6          |   |      |       |     |           |
| 8:55371798 | c.499_520del | p.Leu167TrpfsTer213 | Frameshift | IPAH/HPAH | Montani et al., 2022 | M   | 32         |   |      |       |     |           |
| 8:55371920 | c.610C>T     | p.Arg204Cys         | Missense   | IPAH/HPAH | Montani et al., 2022 | F   | 24         | 2 | 29.1 | 0.634 | LB  | .         |
| 8:55371974 | c.664C>A     | p.Pro222Ala         | Missense   | APAH-CHD  | Zhu et al., 2018     | M   | 9          | 2 | 27.6 | 0.648 | VUS | .         |
| 8:54459442 | c.693delC    | p.Asp233fsTer154    | Frameshift | IPAH/HPAH | Wang et al., 2019    | unk | unk        | 2 | .    | .     | LP  | .         |
| 8:55372028 | c.718C>G     | p.Pro240Ala         | Missense   | IPAH/HPAH | Montani et al., 2022 | M   | 27         | 2 | 15.0 | 0.230 | LB  | .         |

|                          |                        |                                            |                          |                        |                                    |        |         |   |      |       |     |            |
|--------------------------|------------------------|--------------------------------------------|--------------------------|------------------------|------------------------------------|--------|---------|---|------|-------|-----|------------|
| 8:54459532               | c.788delC              | p.Pro263ArgfsTer124                        | Frameshift               | APAH-TX                | Zhu et al., 2019                   | M      | 31      | 2 | .    | .     | LP  | .          |
| 8:54459532<br>8:54459532 | c.788dupC<br>c.788dupC | p.Glu264GlyfsTer101<br>p.Glu264GlyfsTer101 | Frameshift<br>Frameshift | IPAH/HPAH<br>IPAH/HPAH | This study<br>Montani et al., 2022 | M<br>F | 11<br>3 | 2 | .    | .     | LP  | .          |
| 8:55372122               | c.817dupC              | p.Arg273ProfsTer92                         | Frameshift               | IPAH/HPAH              | Gräf et al., 2018                  | unk    | unk     | 2 | .    | .     | LP  | .          |
| 8:54459567               | c.818dupG              | p.Leu274ThrfsTer91                         | Frameshift               | IPAH/HPAH              | Wang et al., 2019                  | unk    | unk     | 2 | .    | .     | LP  | .          |
| 8:55372392               | c.1082C>A              | p.Thr361Lys                                | Missense                 | IPAH/HPAH              | Gräf et al., 2018                  | unk    | unk     | 2 | 26.3 | 0.474 | LB  | .          |
| 8:55372446               | c.1136A>T              | p.Tyr379Phe                                | Missense                 | IPAH/HPAH              | Gräf et al., 2018                  | unk    | unk     | 2 | 22.6 | 0.292 | LB  | 0.00000796 |
| 8:54459940               | c.1190C>T              | p.Ser397Leu                                | Missense                 | IPAH/HPAH              | Zhu et al., 2019                   | F      | 66      | 2 | 32.0 | 0.801 | VUS | 0.00000398 |
| 8:55372512               | c.1203delC             | p.Asp401fsTer53                            | Frameshift               | APAH-CHD               | Zhu et al., 2018                   | F      | 30      | 2 | .    | .     | LP  | .          |
| 8:54459973               | c.1224delC             | p.Cys409AlafsTer45                         | Frameshift               | IPAH/HPAH              | Zhu et al., 2019                   | M      | 19      | 2 | .    | .     | LP  | .          |

**Supplementary Table S1.** Summary of *SOX17* variants described by the literature and this study. Sex: M: Male; F: female; unk: unknown; VF: variant frequency. CADD (v1.6); ACMG classification: P (pathogenic); LP (likely pathogenic); VUS (variant of unknown significance); LB (likely benign); B (benign).
